# Supplementary material
Source: PubMed Central journal article supplement (PMC6102137)
Supplement: supp_RA118.003075_136918_2_supp_151303_pfq5xf.pdf [file supp_RA118.003075_136918_2_supp_151303_pfq5xf.pdf]

# Figure S1

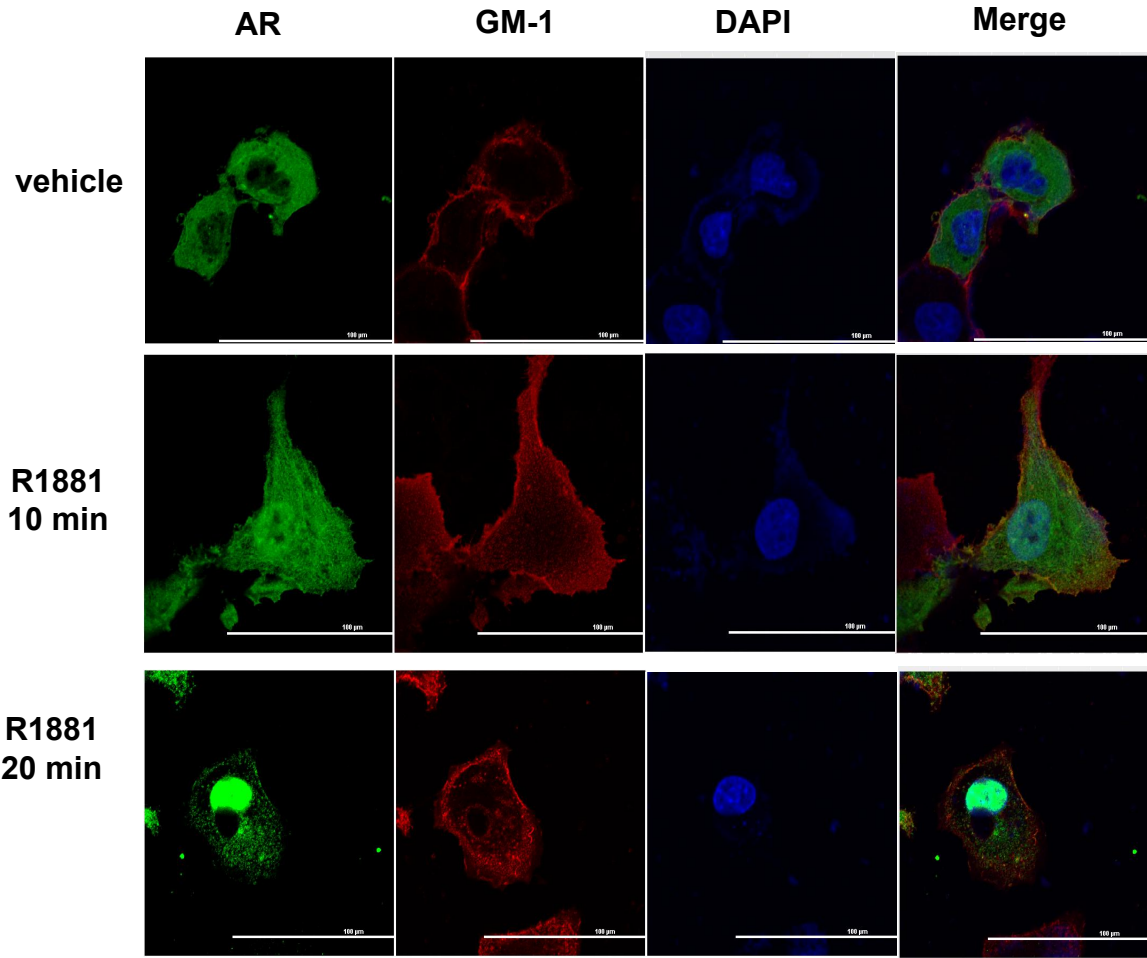

**Figure S1. Intracellular localization of AR by immunofluorescence.** COS-7 cells transfected with AR were cultured on chamber slides in phenol-red free DMEM containing 5% charcoal-stripped FBS and treated with 1 nM R1881 for the indicated times. Following fixation, the slides were stained for AR by an anti-AR (green), for membrane marker GM-1 by Cholera Toxin Subunit B (red), and for nuclei by DAPI (blue). Scale bar is 100 µm.

# Figure S2

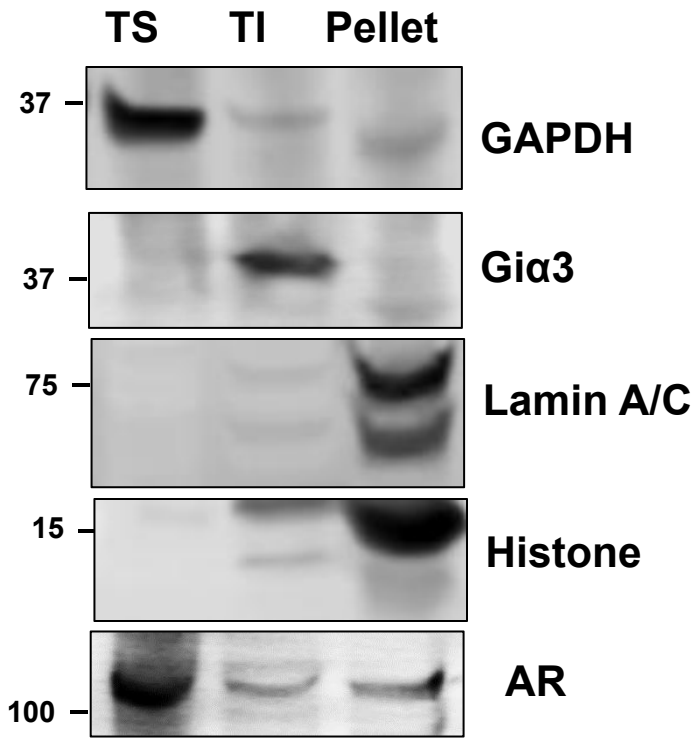

**Figure S2. Assessment of the membrane fractionation assay.** LNCaP cells cultured in an androgen-depleted condition were separated into Triton X-100-soluble (TS), Triton X-100-insoluble/octylglucoside-soluble (TI) and pellet (insoluble in both Triton X-100 and octylglucoside) fractions. Western blotting was performed to detect the distribution of GAPDH (cytoplasm marker), Giα3 (membrane marker), histone, and lamin A/C (nuclear markers). AR was detected in all three fractions.

# Figure S3

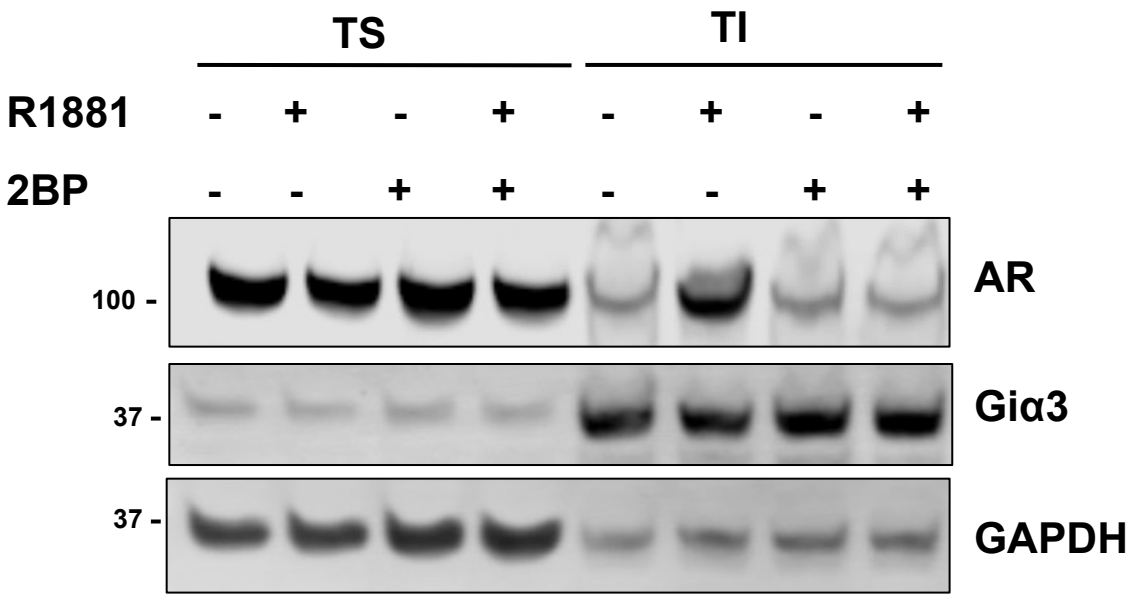

**Figure S3. Androgen-induced AR membrane translocation is blocked by a palmitoylation inhibitor.** LNCaP cells were pretreated with 10  $\mu$ M 2-BP for 16 h, then stimulated with 1 nM R1881 for 20 min. TS/ TI fractions were extracted and analyzed by Western blots.

# Figure S4

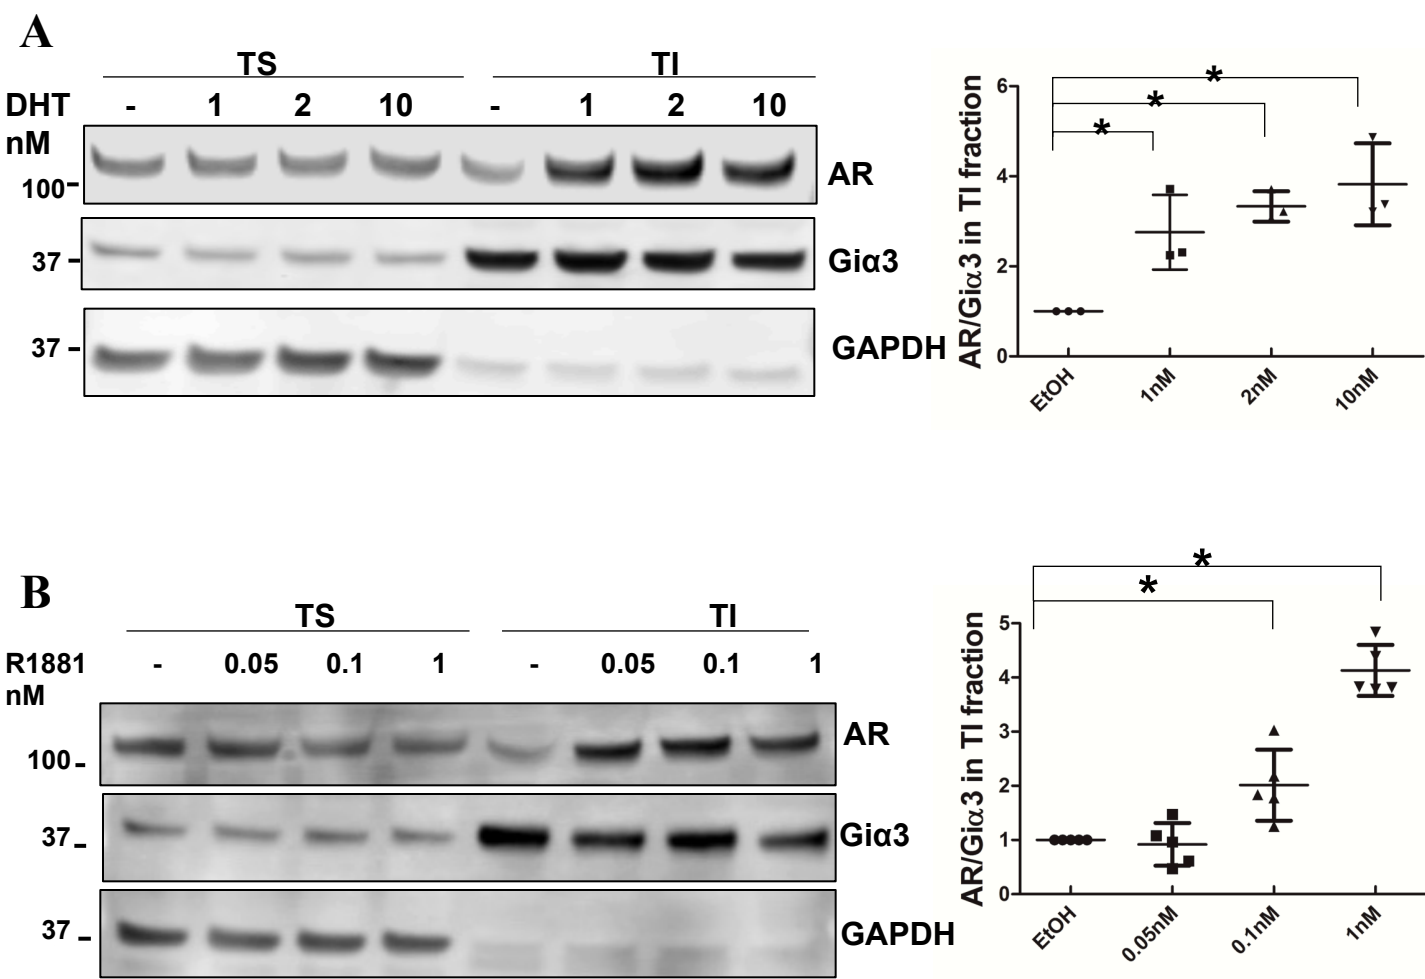

**Figure S4. AR membrane transport induced by different concentrations of androgens.** LNCaP cells were treated with DHT (1, 2, 10 nM, in panel A) or R1881 (50, 100 pM, 1 nM, in panel B) for 20 min. TS/TI fractions were extracted and analyzed by Western blots. Membrane AR levels were calculated as AR/Giα3 ratios and expressed relative to that of the leftmost group. The mean ± SEM from three experiments are plotted. \*,  $P < 0.05$ .

# Figure S5

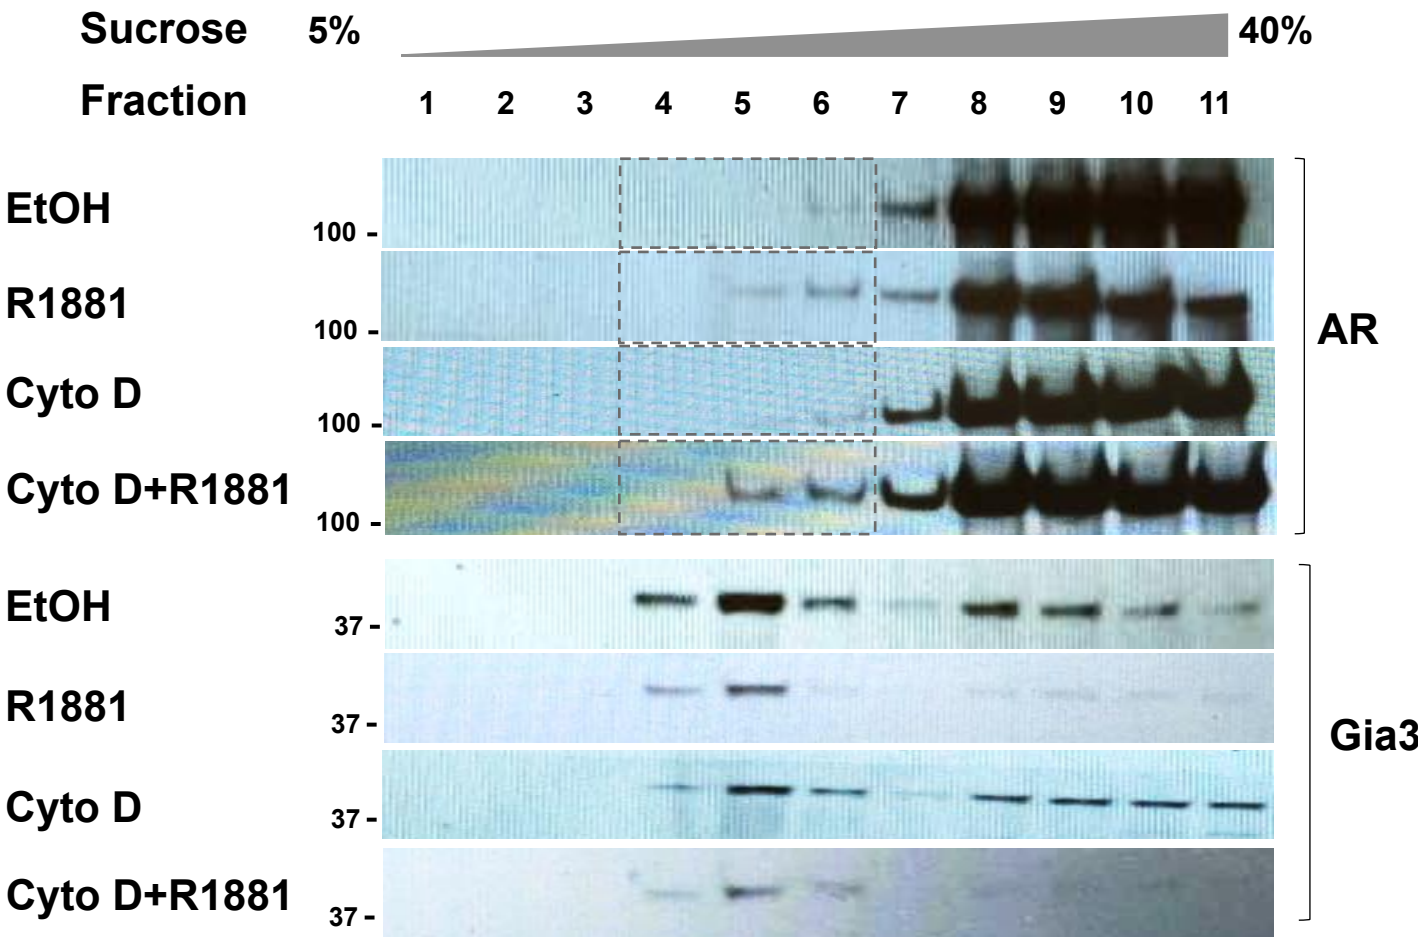

**Figure S5. AR transport to the membrane is not affected by cytochalasin D.** LNCaP cells were pretreated with EtOH or 0.5 mg/ml cytochalasin D overnight, followed by 1 nM R1881 for an additional 20 min. Cell lysates were subjected to sucrose gradient ultracentrifugation and analyzed by Western blots. Gia3 was used as the membrane marker.

# Figure S6

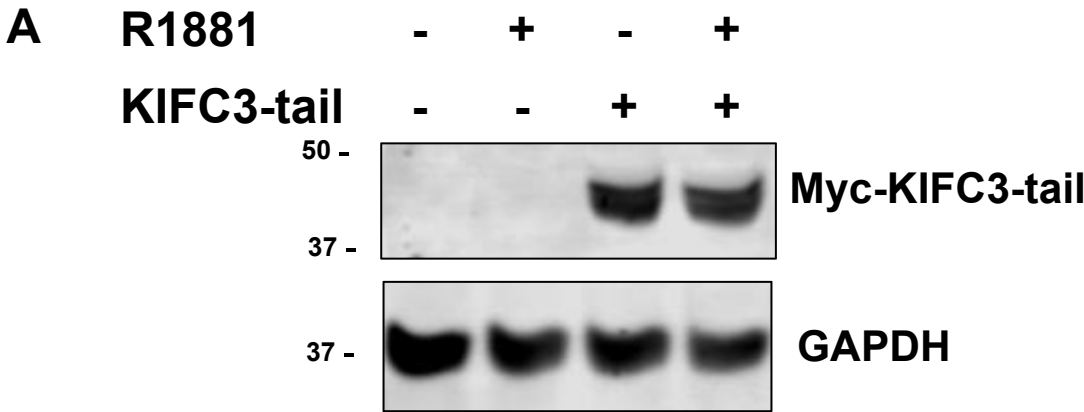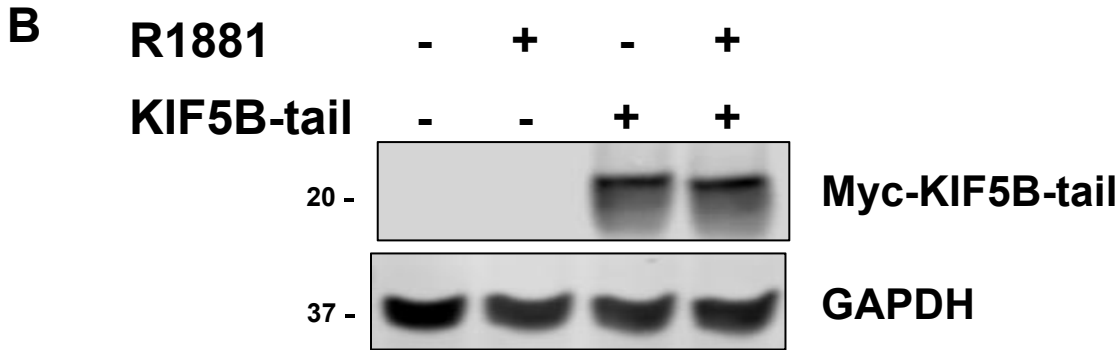

**Figure S6. Expression of KIFC3-tail and KIF5B-tail in LNCaP.** Cells were transiently transfected with KIFC3-tail or KIF5B-tail. Whole cell lysates were collected after 48 h and analyzed by Western blots to confirm the expression of KIFC3-tail and KIF5B-tail.



**Figure S7 Cont'd**

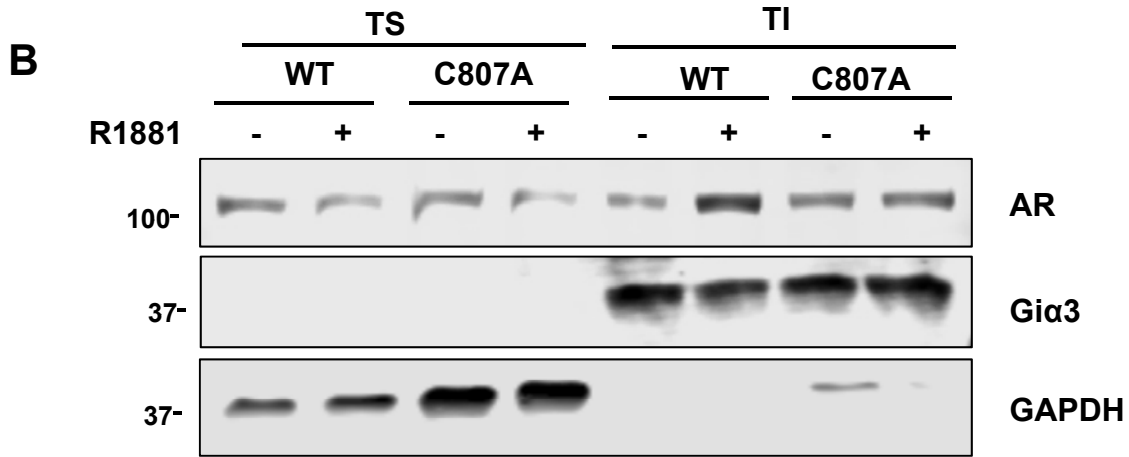

**C**

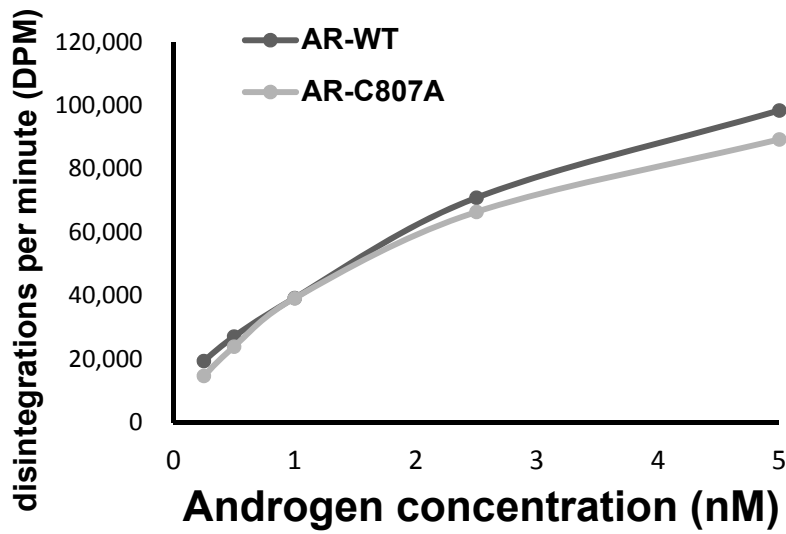

**D**

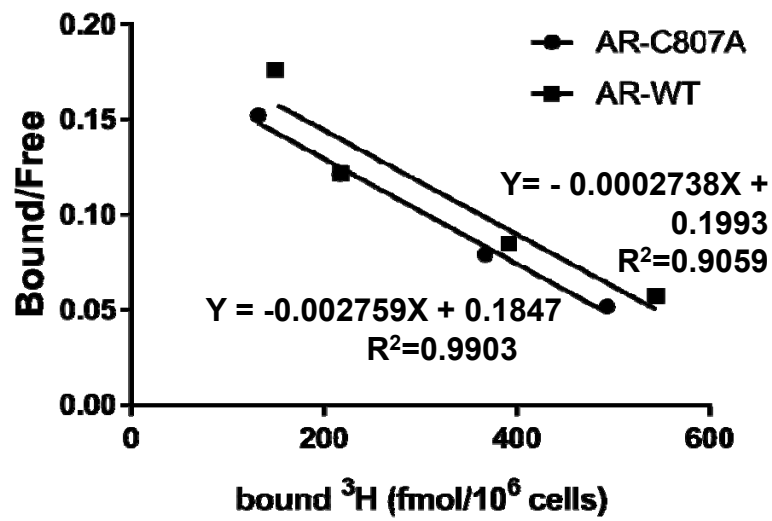



## Figure S7 Cont'd

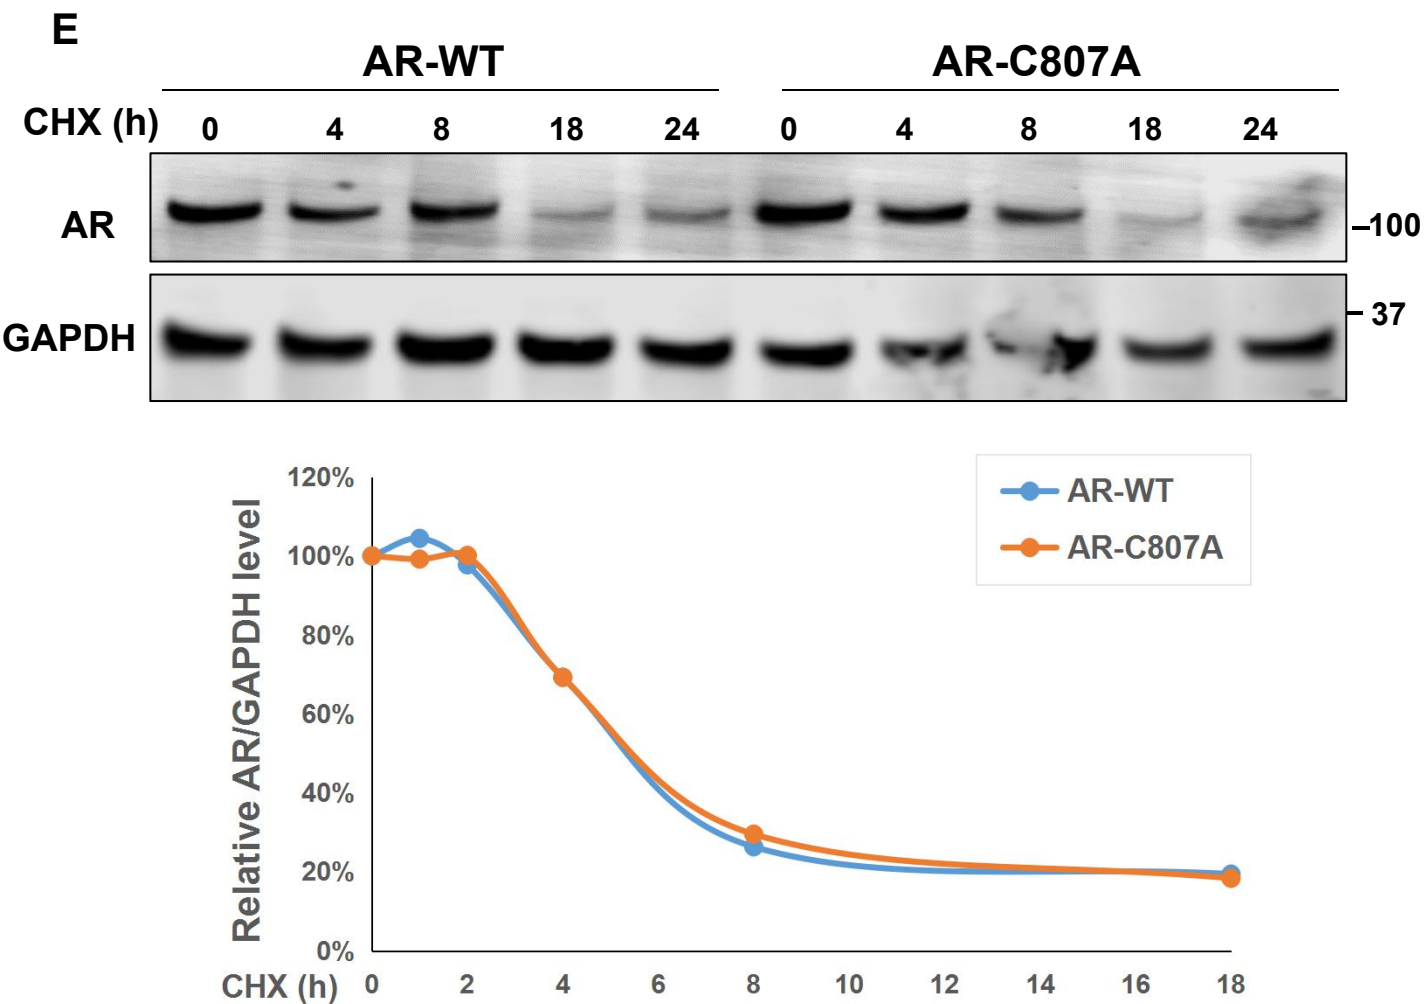

**Figure S7. Characterization of the AR-C807A mutant.** A, intracellular localization of AR-WT/AR-C807A by immunofluorescence. COS-7 cells were transiently transfected with AR-WT or AR-C807A, cultured in phenol-red free DMEM with 5% cs-FBS for 48 h, and stimulated with 1 nM R1881 for 20 min. Following fixation, cells were stained for AR by an anti-AR (green). B, the localization of AR-WT/AR-C807A at plasma membrane was detected by the TS/TI fractionation assay. C, androgen binding activities of AR-WT and AR-C807A. D, Scatchard plots for AR-WT/AR-C807A ligand binding. The calculated dissociation constant ( $K_d$ ) is 3.652 pM for AR-WT, and is 3.625 pM for AR-C807A. E, stability of AR-WT and AR-C807A. COS-7 cells were transfected with AR-WT or AR-C807A for 48h, and treated with 20  $\mu$ g/ml CHX for different times. AR protein in whole cell lysates were analyzed by Western blotting.

Figure S8

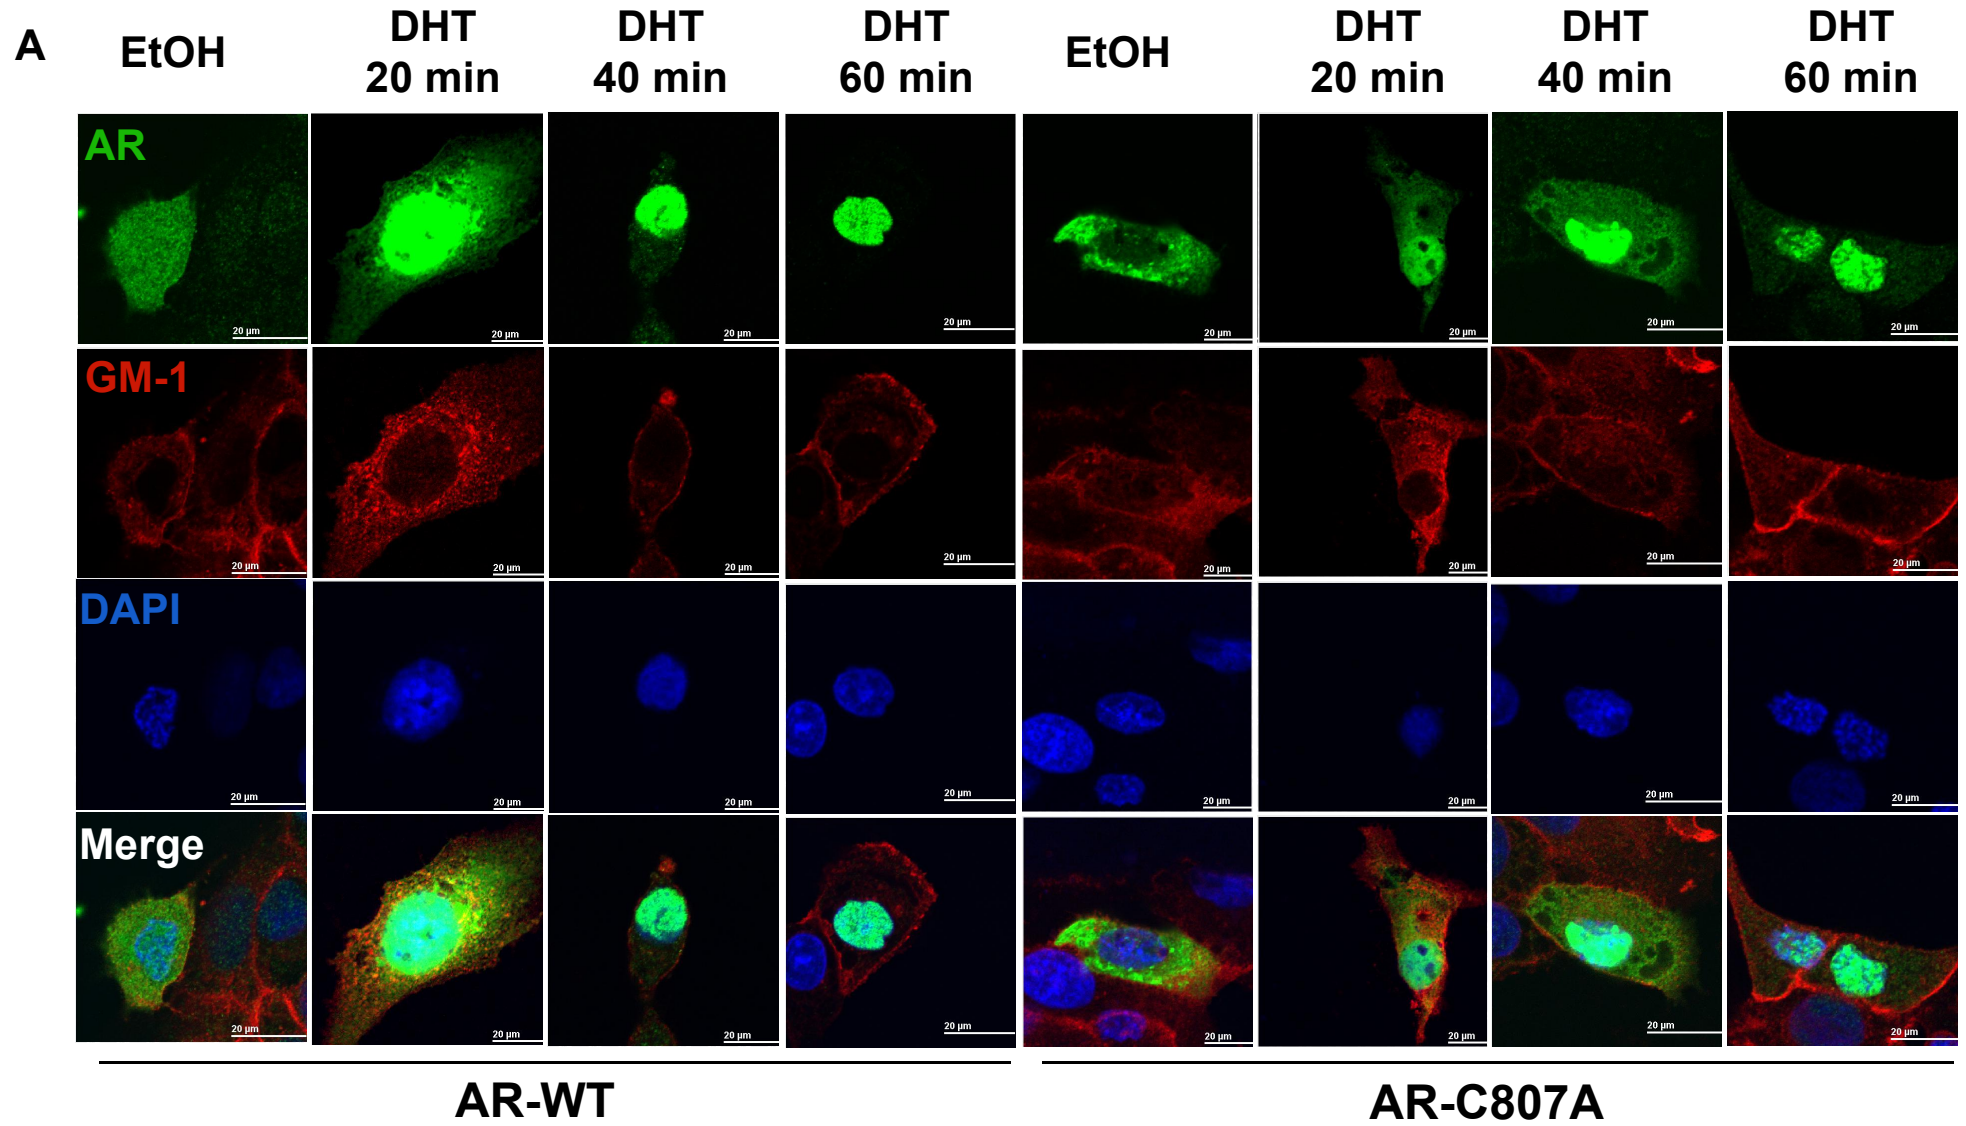

## Figure S8 Cont'd

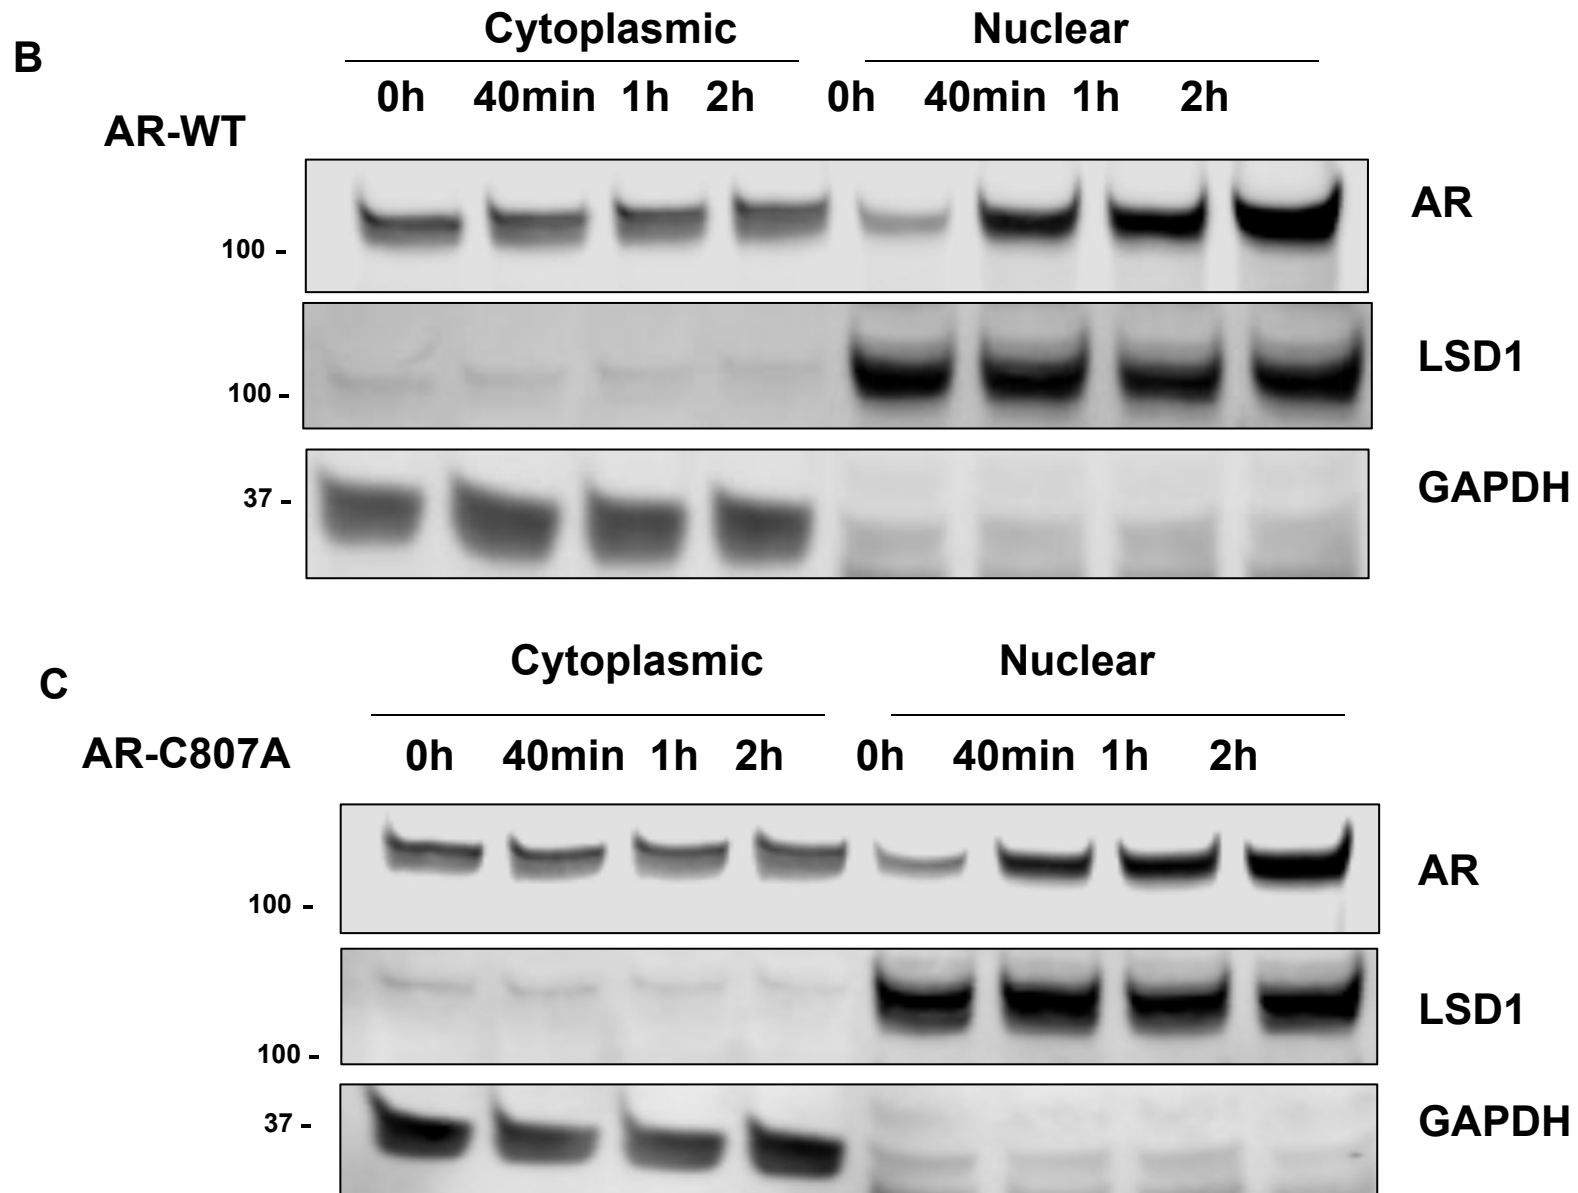

**Figure S8. Nuclear import of AR-WT and AR-C807A.** A, immunofluorescence assay. Transfected COS-7 cells were treated with 1 nM R1881 for the indicated time points and stained for AR, GM-1, and nuclei. Scale bar is 20  $\mu$ m. B and C, subcellular fractionation assay. COS-7 cells were treated with 1 nM R1881 for different time points (0, 40 min, 1 h, 2 h), lysed for cytoplasm/nuclear fractionation, and analyzed by Western blots. LSD1 was used as the nuclear marker and GAPDH as the cytoplasmic marker.

**Figure S9**

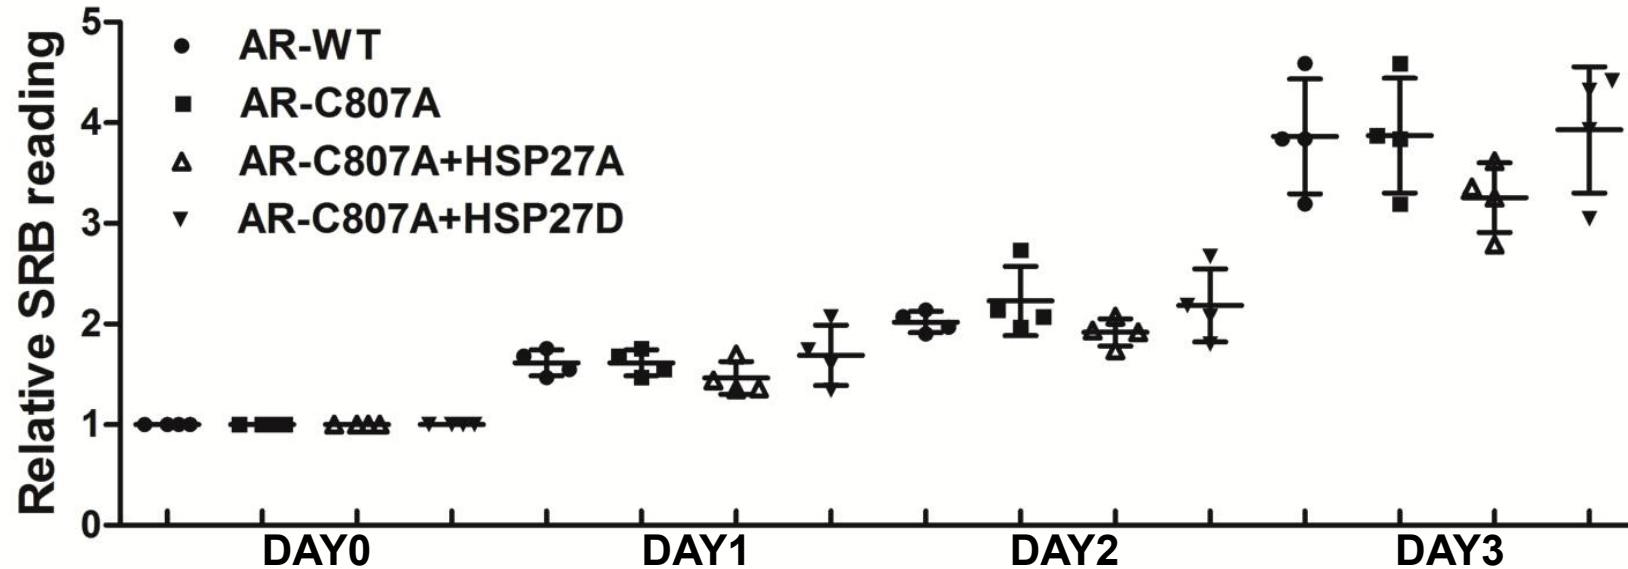

**Figure S9. Cell growth assay in DU145 cells without androgen stimulation.** Cells were co-transfected with AR-WT/AR-C807A and vector/HSP27A/HSP27D, cultured in RPMI 1640 supplemented with 10% cs-FBS for 1 to 3 days, and the SRB assay was performed. The data were expressed as folds of the day 0 readings and plotted as mean  $\pm$  SD from three experiments.
